# Supplementary material
Source: Springer Nature journal article supplement (https://www.springermedizin.de/resource/supplementary/12889_2011_3830_MOESM3_ESM.pdf/9490622)

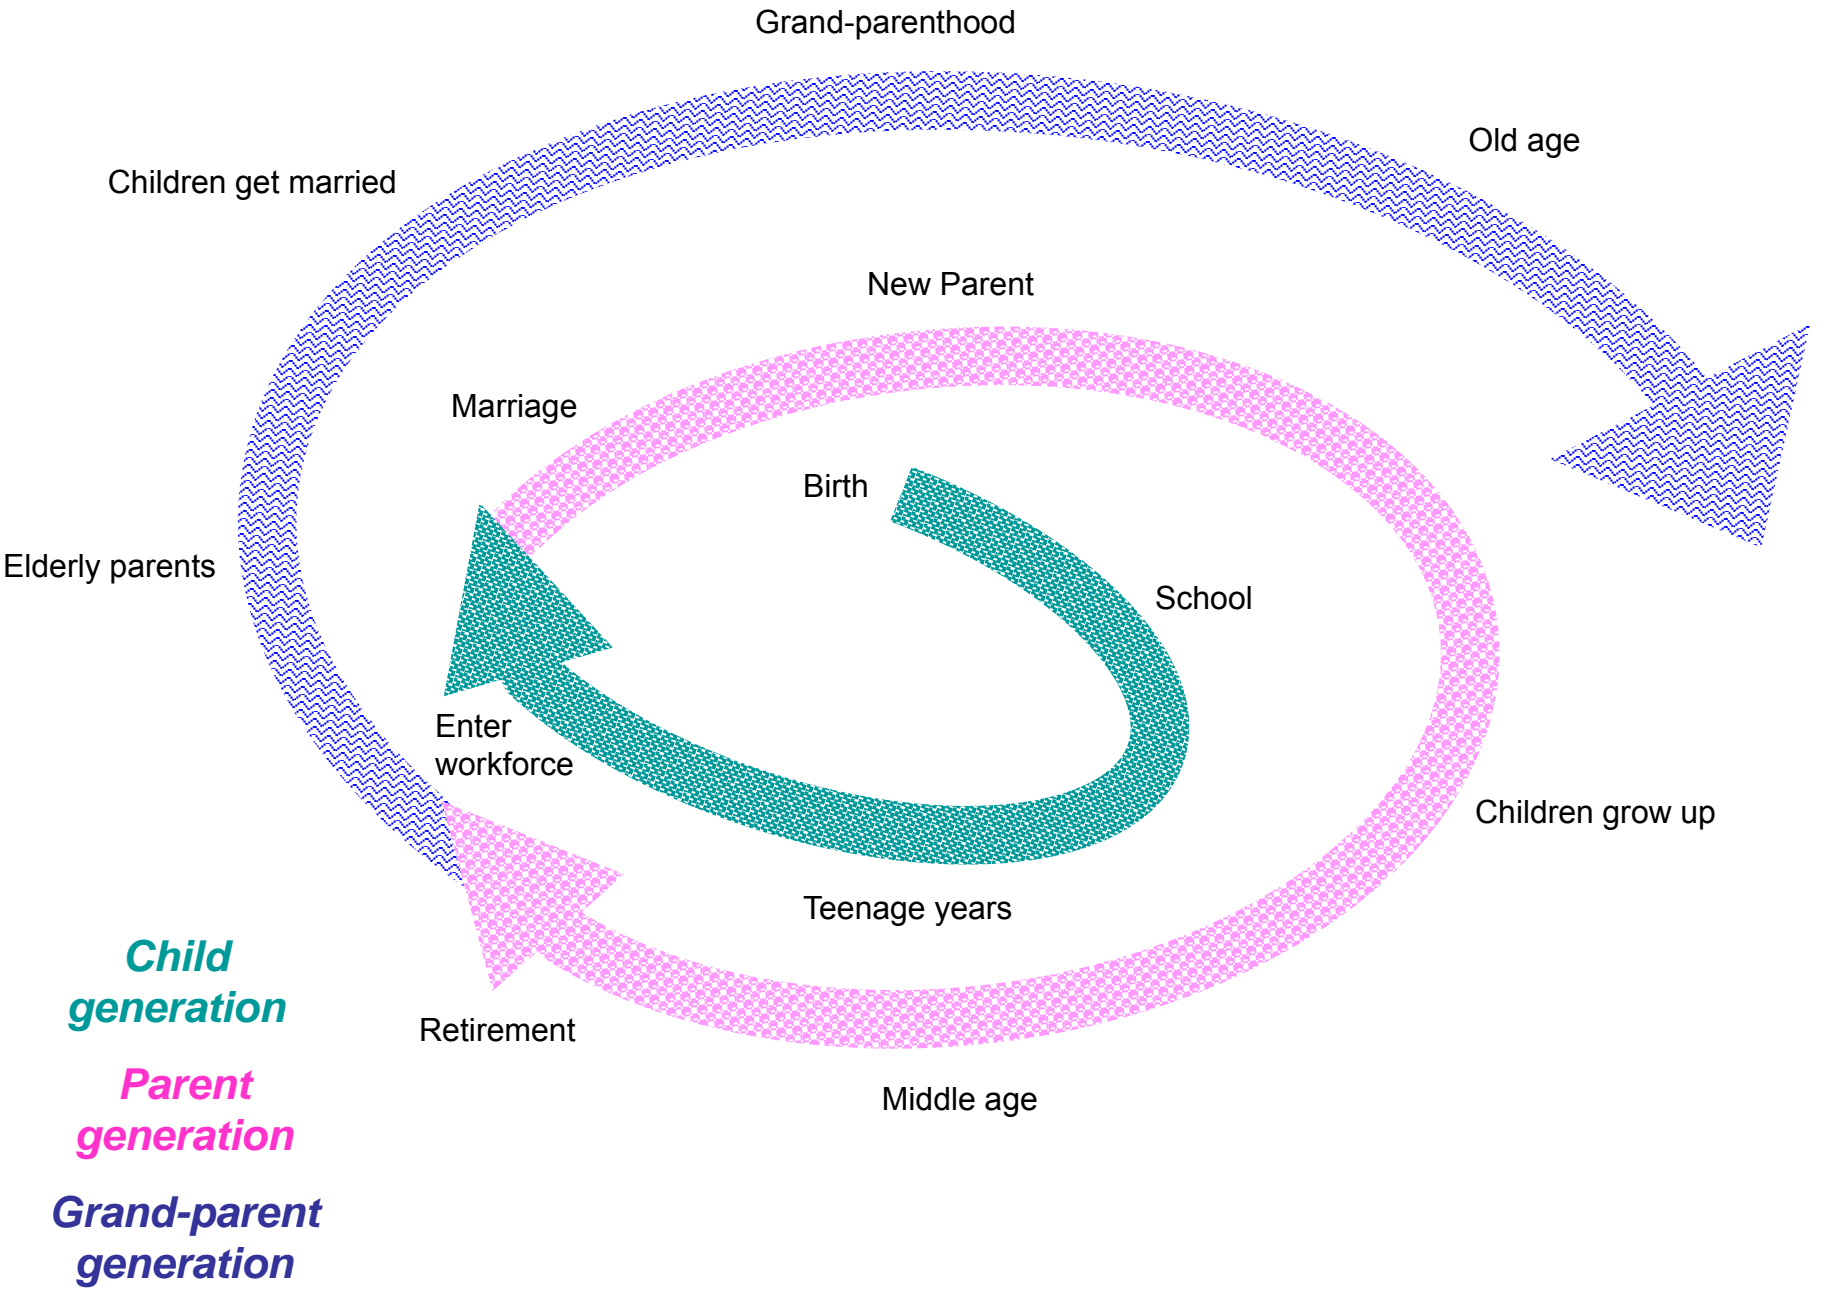

Supplement: MOESM3 [file 9490622]
